# Supplementary material
Source: PubMed Central journal article supplement (PMC3080098)

## Supplemental Text

**Table S1.** Primers used in this study. “FAM” and “TAM” refer to fluorescent modifications added to probes used in qPCR. Y refers to randomly inserted C or T nucleotide. R refers to randomly inserted A or G nucleotide.

| Primer Name                | Sequence (5'-3')                       |
|----------------------------|----------------------------------------|
| NG1427 5                   | CCGTTCCGCCCGTTCCTTTC                   |
| NG1427 6                   | GTCGTTTAAACCGAGAGACGGACTGTATGTG        |
| NG1427 7                   | GTACGTTTAAACGCAGCCAATCGATACTACAC       |
| NG1427 8                   | CGAAATGGCCAAACAAGAG                    |
| NG1427 Ab2.2               | CCGCCGGCTAGCATGTTTACTTTAGATGATTGA      |
| NG1427 nostop2             | GGCGGCAAGCTTAACCGTCTGCCGAACCACTC       |
| NG1427 comp5' end          | CCGCCGTTAATTAATTTACTTTAGATGATTGA       |
| NG1427 comp3' end          | GGCGGCGGCCGGCCTTCAAACCGTCTGCCGAACCACTC |
| pacI-NG1427-CF             | GGCCGCTTAATTAATAATTTTGTTTAACTTT        |
| fseI-NG1427-CR             | GGCCGGGGCCGGCCCAACTCAGCTTCCTTTCGGGCT   |
| NG1428 1 primer            | GGAATTGTCCCAATAGATAAG                  |
| NG1428 2H primer           | GCCGGCGGTYRACCGCAGTATAGATAAGATATTTGC   |
| NG1428 3H primer           | GCCGGCGGTYRACCTTGAACGAACAGGAAATGCTC    |
| NG1428 4 primer            | CAATCAAGCGTTGGTCGAAGTCTTC              |
| NG1427 qPCR Forward Primer | GTTCCCTCATGACCGACAAACTG                |
| NG1427 qPCR Reverse Primer | ATCCCTTGCTTACGATACCTTGG                |
| NG1427 qPCR Probe Primer   | FAM-CCGTATCCCGCAGCCGCCCG-TAM           |
| NG1428 qPCR Forward Primer | TTTACCTCATTCTGCTTTGCCTTC               |
| NG1428 qPCR Reverse Primer | CTTTGGAAAGGGGAGACTTGTTCTG              |
| NG1428 qPCR Probe          | FAM-ACCGTTCTGAAGCCAAACAGCCCG-TAM       |
| RecN qPCR Forward Primer   | ATGCTTCTAACACTTTCTTTGCGTG              |
| RecN qPCR Reverse Primer   | AAATAAACTAATTTTCGACGCAAG               |
| RecN qPCR Probe            | FAM-ATTGAACCCGAAGAGTGGCCTGCCAA-TAM     |
| RecA qPCR Forward Primer   | ACAGGCTTTGGAAATCTGCGACAC               |
| RecA qPCR Reverse Primer   | TTTGATGTGTCCGGTCAGTTTGCG               |
| RecA qPCR Probe            | FAM-AAAGCCGAAATCGAAGGCGATATGGG-FAM     |

|                                        |                                                                          |
|----------------------------------------|--------------------------------------------------------------------------|
| Omp3 qPCR Forward Primer               | TATTCGTTGCATTGCTCGCTTCCG                                                 |
| Omp3 qPCR Reverse Primer               | TCTACGCGACCTTGGCTTGCTTTA                                                 |
| Omp3 qPCR Probe                        | FAM-ACCGTAAGCGGCCAATCGAACGAAAT-FAM                                       |
| NG1427::cat 5' end qPCR Forward Primer | GCAGCCAATCGATACTACACCC                                                   |
| NG1427::cat 5' end qPCR Reverse Primer | GGGAGCGGAAGGATATTTATGGAAA                                                |
| NG1427::cat 5' end qPCR Probe Primer   | FAM-TGCTGAAGCCC GCAATCGTCATTTC A-TAM                                     |
| G113D point mutation Forward Primer    | CGGGCGGCTGCGGACTACGGGCAGTTT                                              |
| G113D point mutation Reverse Primer    | AAACTGCCCGTAGTCCGCAGCCGCCCG                                              |
| C64S point mutation Forward Primer     | TTAAGCAGTTGAAGGGGAGTAGTATCGAATGGCTG                                      |
| C64S point mutation Reverse Primer     | CAGCCAATCGATACTACTCCCCTTCAACTGCTTAA                                      |
| IGR 1427 Primer                        | GGCCGCTTAATTAATTTTCTATCCTTTTTCTG                                         |
| Comp3 HA                               | GGCGGCGCCGGCCTCATCAGGCGTAGTCCGGGACGTC<br>GTAG-GGGTAAACCGTCCTGCCGAACCACTC |
| IGR1427/1428 Primer F                  | TCAATCATCTAAAGTAAACA                                                     |
| IGR1427/1428 Primer R                  | TTTCTATCCTTTTTCTGTCAA                                                    |
| IGR-RecN Primer F                      | TGAAATTCCAAATGCCG                                                        |
| IGR-RecN Primer R                      | TGTGAGGATTCCTTAGC                                                        |

## Supplemental Methods:

### *Gc survival assays*

The oxidative killing assays were performed as described in previous publications from our lab (Stohl et al., 2005). Briefly, FA1090 1-81-S2 Gc in amended GCBL were grown to mid-log phase as described above, well-vortexed, diluted 1:10 in GCBL, and treated with a range of H<sub>2</sub>O<sub>2</sub>. Colonies were counted after overnight growth and survival for each concentration of H<sub>2</sub>O<sub>2</sub> was calculated relative to the untreated dose.

The protocol for assaying Gc survival following treatment with diamide (Sigma) was similar to the procedure described above, using FA1090 1-81-S2<sub>nv</sub> Gc. Following 1:10 dilution of mid-log phase Gc in GCBL, 1 ml aliquots of diluted Gc was added to 15 ml Falcon tubes. The dosage of diamide used in these experiments was 0 mM, 10 mM, and 20 mM. Following a 30 minute incubation in a drum rotator at 37°C, cultures were serially diluted in GCBL and plated. Survival was measured relative to the untreated samples.

Growth conditions were followed as described above for the MMS assay using FA1090 1-81-S2<sub>nv</sub> Gc. Following 1:10 dilution of mid-log phase GC in GCBL, 2ml aliquots of diluted Gc were added to 15ml Falcon tubes. Methyl methanesulfonate (MMS; Sigma) was added to a final concentration of 0, 0.001%, 0.005%, and 0.01%. Following a 60 minute incubation in a drum rotator at 37°C, cultures were serially diluted in GCBL and plated. Survival was measured relative to the untreated samples. The UV and PMN-mediated killing assay were performed identical to those described in (Skaar et al., 2002, Stohl et al., 2005) using FA1090 1-81-S2<sub>nv</sub> Gc.

**Figure S1. Examination of *ng1427* contribution to Gc survival.** Exponential phase *ng1427::cat*, *ng1428::tetM*, and parental Gc grown in liquid culture were exposed to: A: H<sub>2</sub>O<sub>2</sub>, B: Diamide, C: UV light, and D: PMNs with survival quantified relative to each respective untreated sample. IPTG-inducible complement strains with wild-type (E) or the G113D complement (F) were treated with H<sub>2</sub>O<sub>2</sub> with survival quantified relative to each respective untreated sample. Statistics were done using two-tailed Student's *t*-test with significance determined at *p*<0.05. Asterisk denotes *p*<0.05 between parent strain and *ng1427::cat*, and while statistical significance between parent and *ng1427::cat* occurred, in each case it was considered biologically irrelevant due to lack of major phenotype or failure to obtain significance upon further repetition. Error bars are +/- s.e.m.

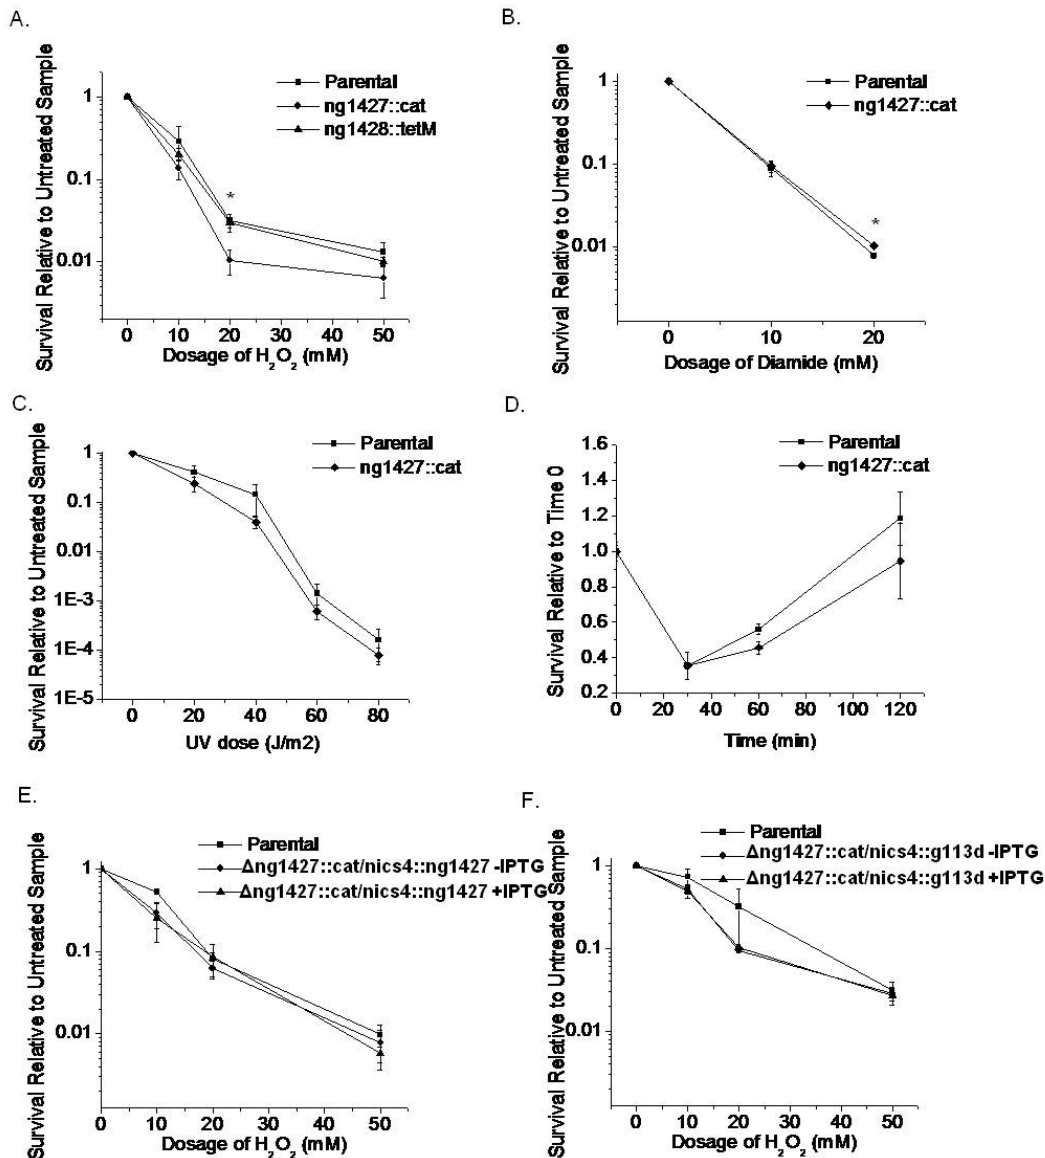

Supplement: NIHMS263242-supplement-Supp_Figure_S1___Table_S1.pdf [file NIHMS263242-supplement-Supp_Figure_S1___Table_S1.pdf]
